# Supplementary material for: Hydrogen-bond driven assembly of a molecular capsule facilitated by supramolecular chelation
Source: Royal Society of Chemistry journal article supplement (doi:10.1039/c1cc14124d), 2011-01-01
Supplement: c1cc14124d.pdf [file c1cc14124d.pdf]

# **Hydrogen-bond driven assembly of a molecular capsule facilitated by supramolecular chelation**

**Christer B. Aakeröy,\* Arbin Rajbanshi and John Desper**

## **Supplementary Information**



Hz, 4H), 4.32 (d, 6.0Hz, 4H), 2.22 – 2.19 (m, 8H), 1.39 (br, 24H), 0.92 (t, J = 7Hz, 12 H);  $^{13}\text{C}$  NMR ( $\delta\text{H}$ ; 200 MHz,  $\text{CDCl}_3$ ): 155.03, 138.80, 120.85, 98.90, 93.25, 38.14, 32.06, 30.23, 27.61, 22.84, 14.27.

The product **1** was further purified by recrystallization with dichloromethane yielding a white powder, (0.25 g). M. P. >280 °C;  $^1\text{H}$  NMR ( $\delta\text{H}$ ; 200 MHz,  $\text{CDCl}_3$ ): 7.07 (s, 2H), 7.04 (s, 2H), 5.98 (d, J = 8.0Hz, 4H), 4.86 (t, J = 8.0 Hz, 4H), 4.37 (d, 6.0Hz, 4H), 2.19 – 2.22 (m, 8H), 1.39 (br, 24H), 0.92 (t, J = 7Hz, 12 H).

### Synthesis of C-pentyl-1,3-di-(2-acetamidopyridyl-5-ethynyl)-2,4-dibromocavitand, **3**

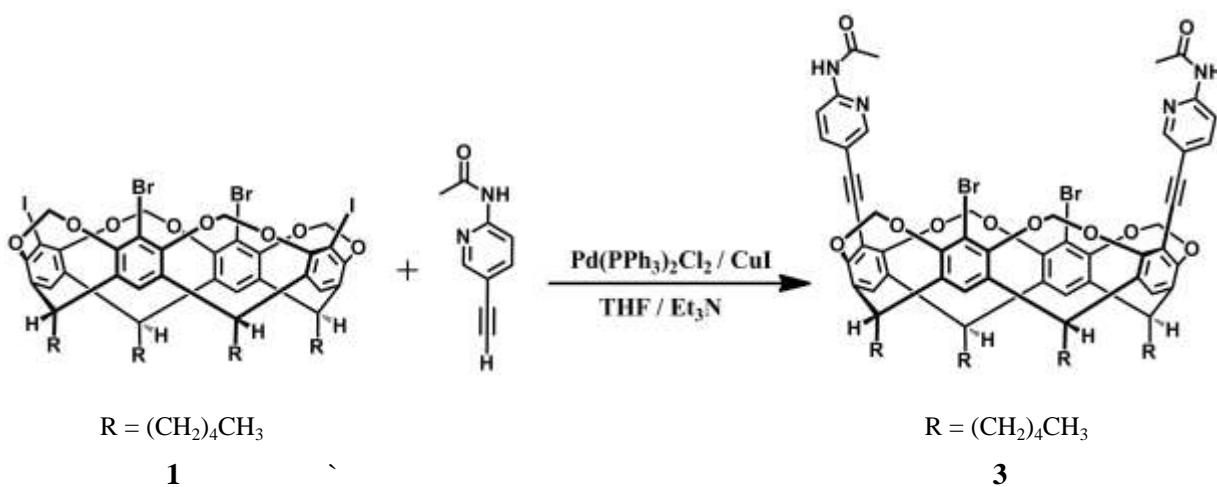

C-Pentyl-1,3-dibromo-2,4-diiodocavitand **2** (0.200 g, 0.163 mmol) was placed in a round bottomed flask and warmed to 50 °C with stirring for 30 minutes to remove moisture. 2-Acetamido-5-ethynylpyridine (0.075 g, 0.470 mmol), *bis*(triphenylphosphine)palladium (II) dichloride (0.005 g, 0.007 mmol), triphenylphosphine (0.002 mg, 0.008 mmol), and copper(I) iodide (0.001 mg, 0.005 mmol) was added to it along with dry, freshly distilled THF (5 mL) and triethylamine (3 mL). Dinitrogen was bubbled through the mixture for 10 minutes and refluxed at 70 °C under dinitrogen. The reaction was monitored by TLC and upon completion (36 hrs) was cooled to room temperature. The solution was then diluted with ethyl acetate (100 mL), washed with water (3 x 100 mL) and saturated aqueous sodium chloride solution (1 x 100 mL). The organic layer was separated and dried over anhydrous magnesium sulfate. The solvent was removed on a rotary evaporator and the residue was chromatographed on silica with hexane/ethyl acetate/methanol mixture as eluant. The

product was isolated as a white solid, which was recrystallized from ethyl acetate. (100 mg, 48 %). M. P. >285 °C;  $^1\text{H}$  NMR ( $\delta\text{H}$ ; 200 MHz,  $\text{CDCl}_3$ ): 8.34 (s, 2 NH), 8.18 (d, 2H), 8.03 (s, 2H), 7.73 (d,  $J = 8.0$  Hz, 2H), 7.09 (s, 2 H), 7.07 (s, 2 H), 6.00 (d,  $J = 8.0$  Hz, 4H), 4.86 (t,  $J = 6.0$  Hz, 4H), 4.51 (d, 8.0 Hz, 4H), 2.23 (s, 14H), 1.40 (m, 24H), 0.93 (m, 12 H);  $^{13}\text{C}$  NMR ( $\delta\text{H}$ ; 200 MHz,  $\text{CDCl}_3$ ): 155.44, 152.21, 150.66, 141.05, 139.63, 138.56, 113.30, 37.29, 32.04, 29.83, 27.60, 24.97, 22.84, 14.25. MALDI-TOF / TOF-MS  $m/z$  1290 ( $[\mathbf{3} + \text{Na}]^+$ ).

### Synthesis of C-pentyltetra-(2-acetamidopyridyl-5-ethynyl)cavitand, **4**

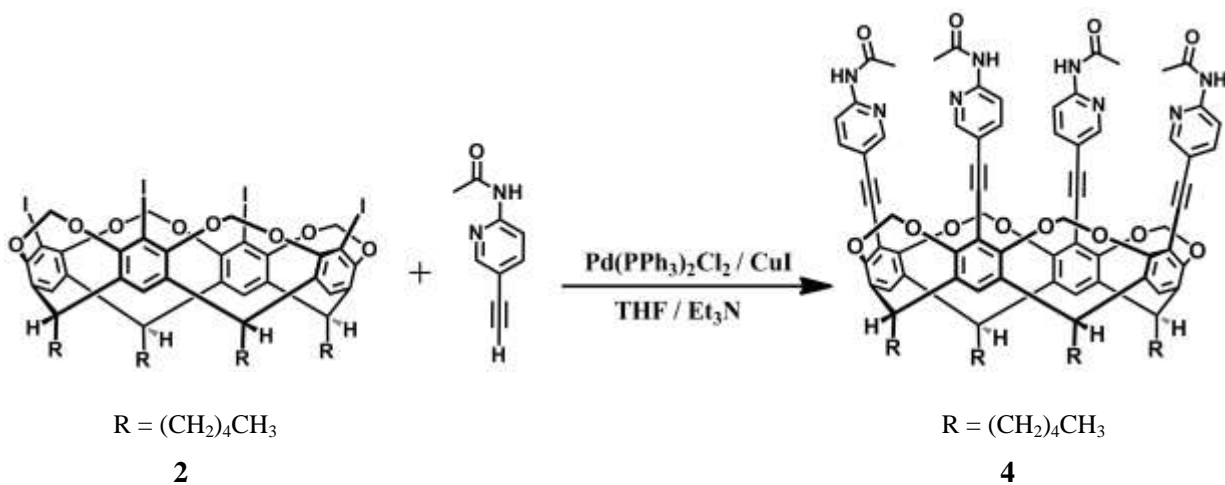

C-Pentyltetraiodocavitand **2** (0.20 g, 0.15 mmol) was placed in a round bottomed flask and warmed to 50 °C with stirring for about 30 mins to remove moisture. 2-acetamido-5-ethynylpyridine (0.14 g, 0.88 mmol), *bis*(triphenylphosphine)palladium (II) dichloride (0.010 g, 0.014 mmol), triphenylphosphine (0.004 g, 0.016 mmol), and copper(I) iodide (0.002 g, 0.010 mmol) was added along with dry, freshly distilled THF (10 mL) and triethylamine (5 mL). Dinitrogen was bubbled through the mixture for 10 minutes and refluxed at 70 °C under dinitrogen. The reaction was monitored by TLC and upon completion (36 hrs) was cooled to room temperature. The solution was then diluted with ethyl acetate (100 mL), washed with water (3 x 100 mL) and saturated aqueous sodium chloride solution (1 x 100 mL). The organic layer was separated and dried over anhydrous magnesium sulfate. The solvent was removed on a rotary evaporator and the residue was chromatographed on silica with hexane/ethyl acetate/methanol mixture as eluant. The product was isolated as a white solid, which was recrystallized from ethyl acetate. (125 mg,

58 %). M. P. >285 °C; <sup>1</sup>H NMR (δH; 200 MHz, CDCl<sub>3</sub>): 9.14 (br, 4 NH), 8.27 (s, 4H), 8.22 (s, 4H), 7.74 (d, J = 8.0 Hz, 4H), 7.12 (s, 4 H), 6.01 (d, J = 6.0 Hz, 4H), 4.86 (t, J = 8Hz, 4H), 4.59 (d, 6.0 Hz, 4H), 2.25 (s, 12H), 2.18 – 2.21 (m, 8H), 1.41 – 1.27 (m, 24H), 0.93 (m, 12 H); <sup>13</sup>C NMR (δH; 200 MHz, CDCl<sub>3</sub>): 169.45, 155.44, 151.11, 150.04, 141.24, 138.73, 120.71, 115.81, 113.96, 112.95, 94.26, 83.92, 36.72, 32.02, 29.66, 27.61, 24.84, 22.84, 14.26. FT-IR (KBr pellet):  $\nu$  (cm<sup>-1</sup>) 3293, 2930, 2863, 1697, 1573, 1517, 1368, 1292, 974. MALDI-TOF / TOF-MS *m/z* 1448 ([4 + Na]<sup>+</sup>)

**Table 1** Crystal data and structure refinement for **3** and **4**

| Parameter                                        | <b>3</b>                                                      | <b>4</b>                                                      |
|--------------------------------------------------|---------------------------------------------------------------|---------------------------------------------------------------|
| Empirical formula                                | C79 H93 Br2 N4 O12                                            | C100.60 H113.30 N8 O16.80                                     |
| <i>M</i>                                         | 1450.39                                                       | 1703.29                                                       |
| <i>T</i> /°K                                     | 120(2)                                                        | 120(2)                                                        |
| Wavelength/Å                                     | 0.71073                                                       | 0.71073                                                       |
| Crystal system                                   | Monoclinic                                                    | Triclinic                                                     |
| Space group                                      | P2(1)/m                                                       | P-1                                                           |
| <i>a</i> /Å                                      | 13.3457(7)                                                    | 14.7722(7)                                                    |
| <i>b</i> /Å                                      | 19.5826(9)                                                    | 15.9370(8)                                                    |
| <i>c</i> /Å                                      | 14.0550(8)                                                    | 22.1716(11)                                                   |
| $\alpha$ /°                                      | 90                                                            | 109.733(3)                                                    |
| $\beta$ /°                                       | 99.793(2)                                                     | 96.094(3)                                                     |
| $\gamma$ /°                                      | 90                                                            | 93.890(3)                                                     |
| <i>V</i> /Å <sup>3</sup>                         | 3619.7(3)                                                     | 4855.4(4)                                                     |
| <i>Z</i>                                         | 2                                                             | 2                                                             |
| <i>D</i> (calculated)                            | 1.331 g/cm <sup>3</sup>                                       | 1.165 Mg/m <sup>3</sup>                                       |
| Absorption coefficient                           | 1.184 mm <sup>-1</sup>                                        | 0.080 mm <sup>-1</sup>                                        |
| <i>F</i> (000)                                   | 1522                                                          | 1815                                                          |
| Crystal size (mm <sup>3</sup> )                  | 0.28 x 0.24 x 0.10                                            | 0.30 x 0.20 x 0.10                                            |
| Theta range for data collection                  | 1.47 to 29.13°                                                | 0.99 to 28.40°                                                |
| Index ranges                                     | -18<= <i>h</i> <=18, -26<= <i>k</i> <=26, -14<= <i>l</i> <=19 | -19<= <i>h</i> <=19, -21<= <i>k</i> <=21, -28<= <i>l</i> <=29 |
| Reflections collected                            | 45929                                                         | 99701                                                         |
| Independent reflections                          | 9980 [R(int) = 0.0389]                                        | 23980 [R(int) = 0.0575]                                       |
| Completeness to theta                            | 99.7 %                                                        | 98.4 %                                                        |
| Absorption correction                            | None                                                          | None                                                          |
| Max. and min. transmission                       | 0.8907 and 0.7327                                             | 0.9921 and 0.9765                                             |
| Refinement method                                | Full-matrix least-squares on <i>F</i> <sup>2</sup>            | Full-matrix least-squares on <i>F</i> <sup>2</sup>            |
| Data / restraints / parameters                   | 9980 / 44 / 481                                               | 23980 / 45 / 1136                                             |
| Goodness-of-fit on <i>F</i> <sup>2</sup>         | 1.251                                                         | 1.806                                                         |
| Final R indices [I>2σ(I)]                        | R1 = 0.0823, wR2 = 0.2499                                     | R1 = 0.1055, wR2 = 0.2969                                     |
| R indices (all data)                             | R1 = 0.1321, wR2 = 0.2791                                     | R1 = 0.1804, wR2 = 0.3241                                     |
| Largest diff. peak and hole (e.Å <sup>-3</sup> ) | 1.441 and -1.063                                              | 1.223 and -0.708                                              |

## NMR data

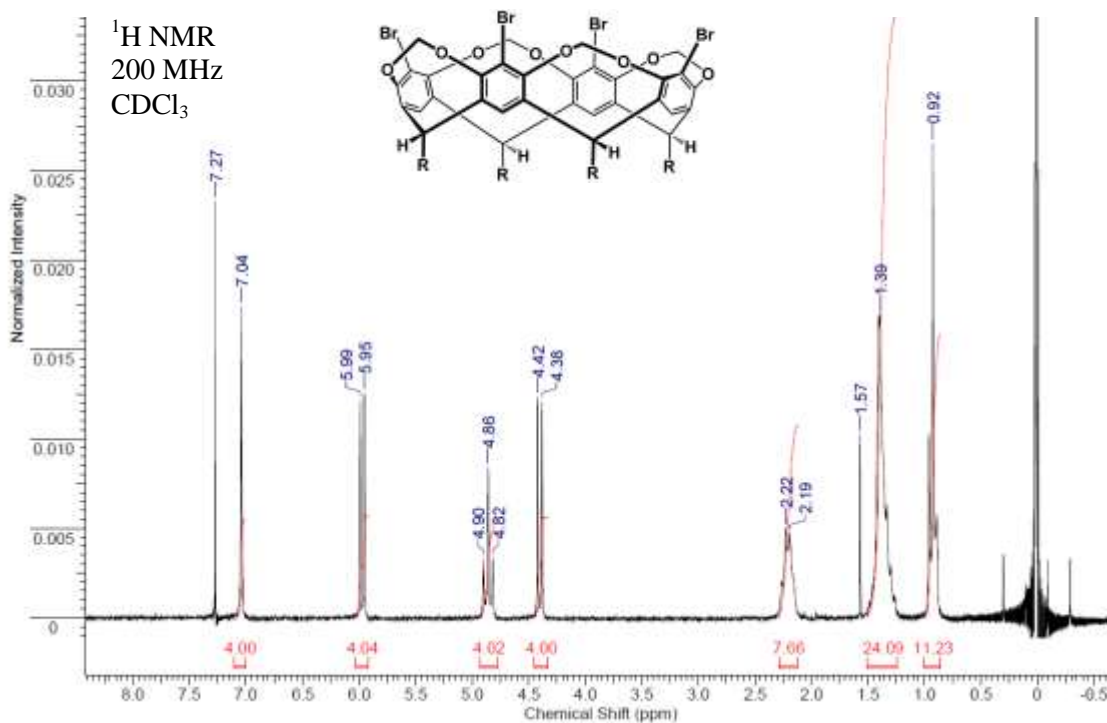

**Fig. 1** <sup>1</sup>H NMR for C-Pentyltetrabromocavitand

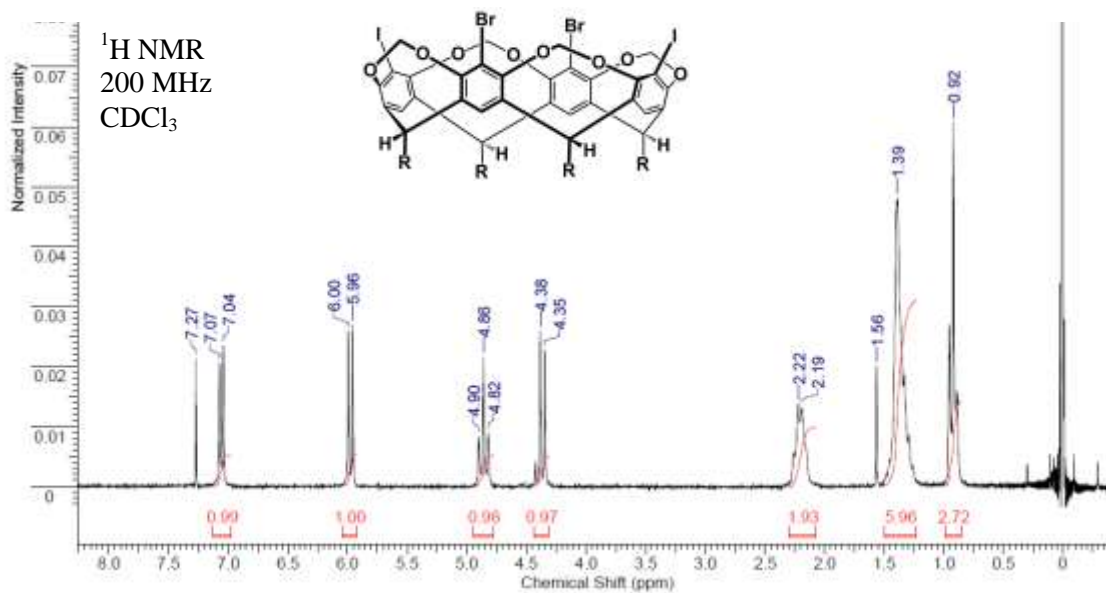

**Fig. 2** <sup>1</sup>H NMR for C-Pentyl-1,3-dibromo-2,4-diiodo-cavitand, **1**

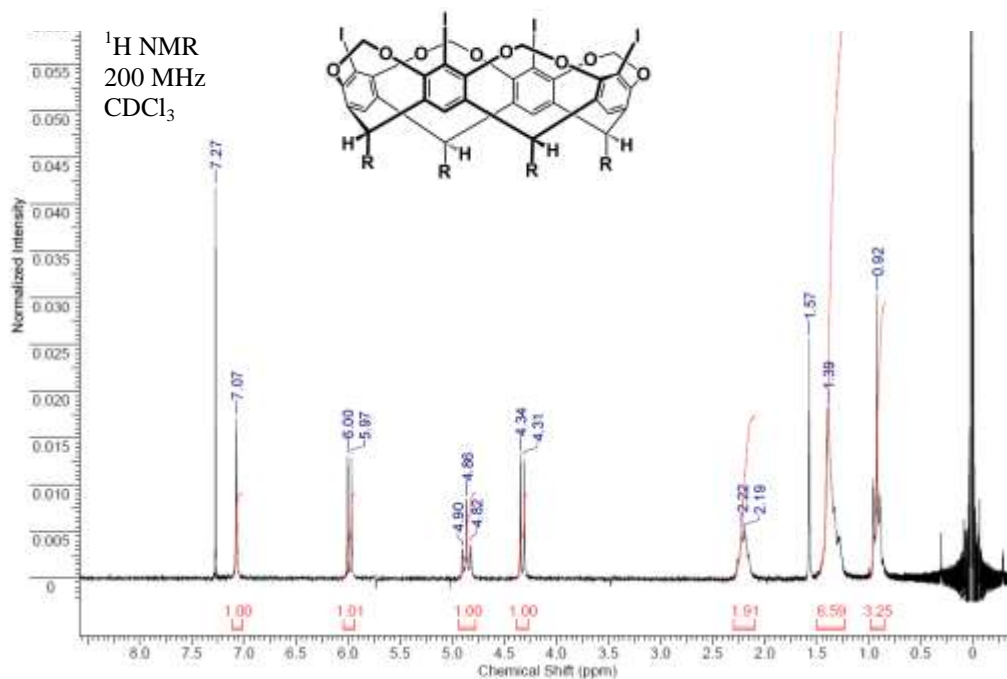

Fig. 3 <sup>1</sup>H NMR for C-Pentyltetraiodocavitand, 2

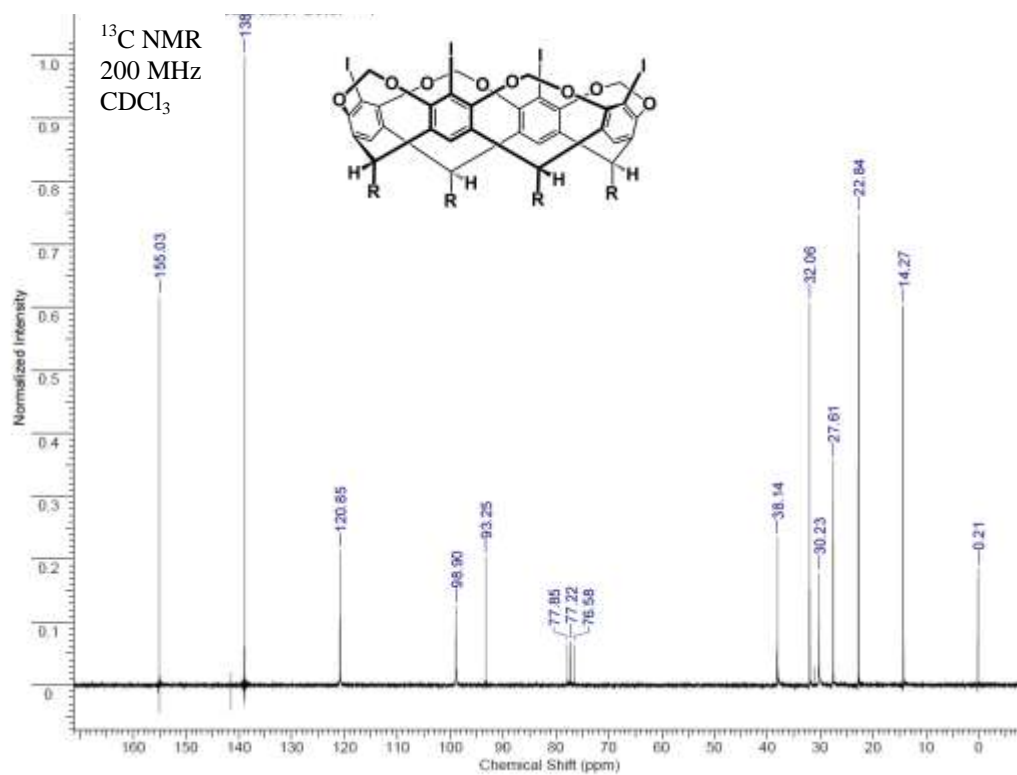

Fig. 4 <sup>13</sup>C NMR for C-Pentyltetraiodocavitand, 2

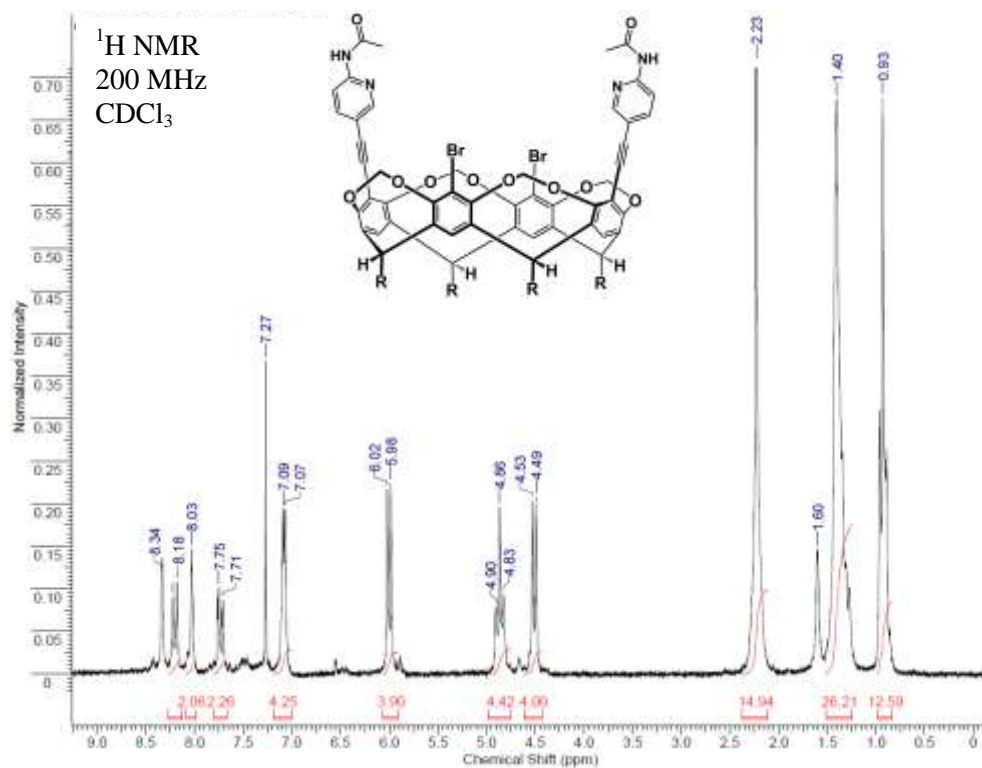

**Fig. 5** <sup>1</sup>H NMR for *C*-Pentyl-1,3-di-(2-acetamidopyridyl-5-ethynyl)-2,4-dibromocavitand, **3**

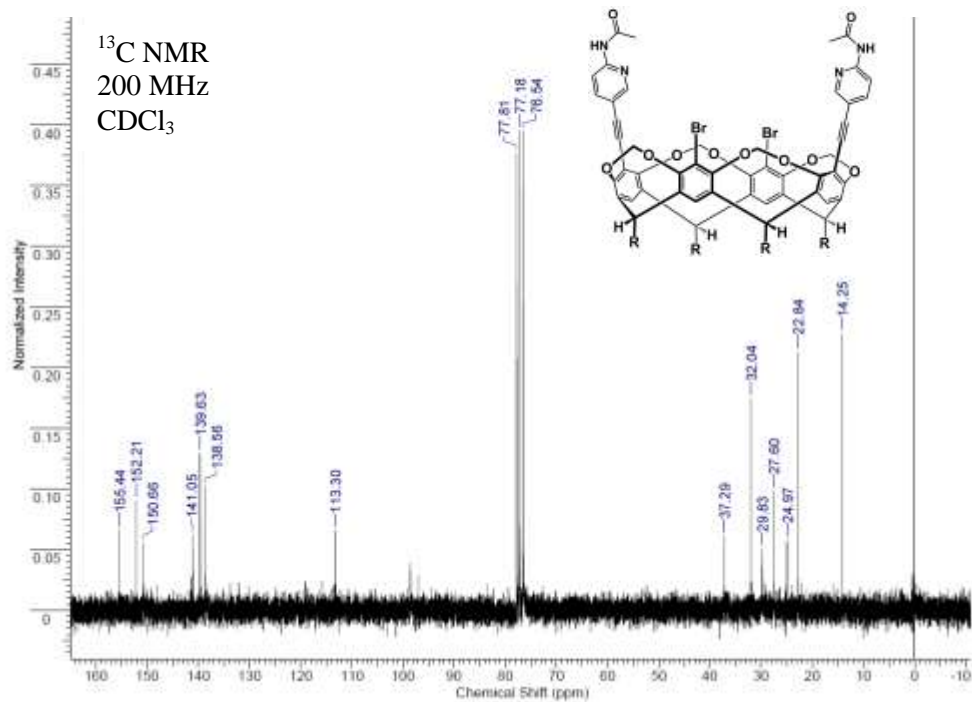

**Fig. 6** <sup>13</sup>C NMR for *C*-Pentyl-1,3-di-(2-acetamidopyridyl-5-ethynyl)-2,4-dibromocavitand, **3**



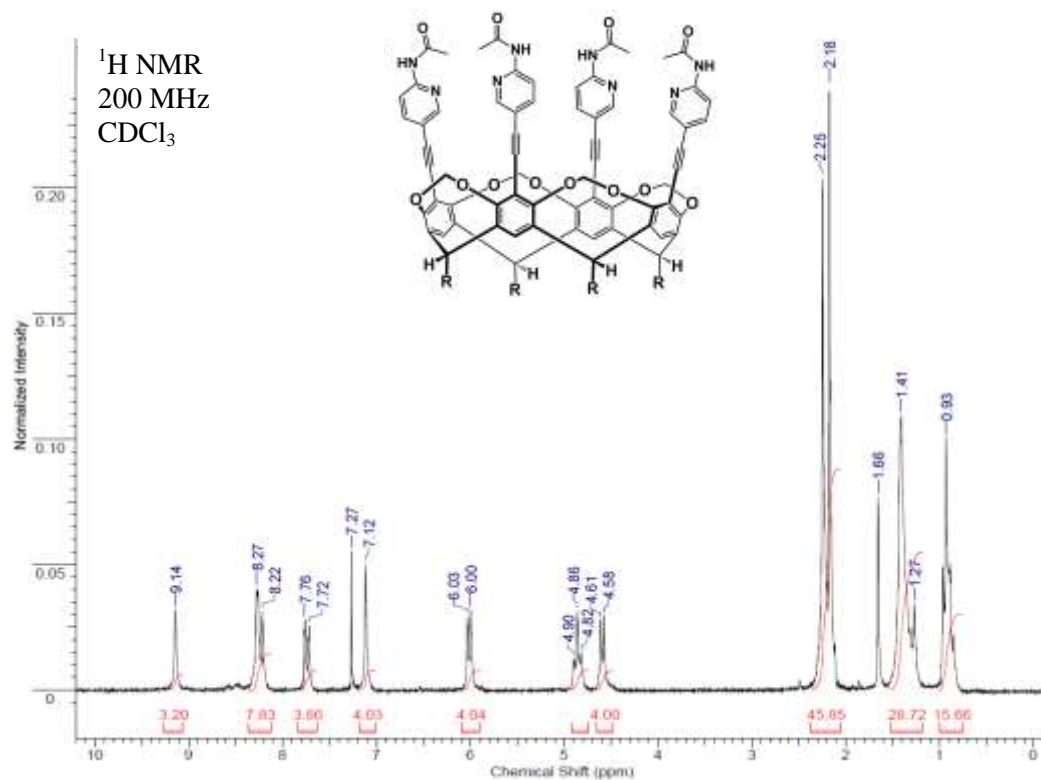

**Fig. 7** <sup>1</sup>H NMR for *C*-Pentyl-tetra-(2-acetamidopyridyl-5-ethynyl)cavitand, **4**

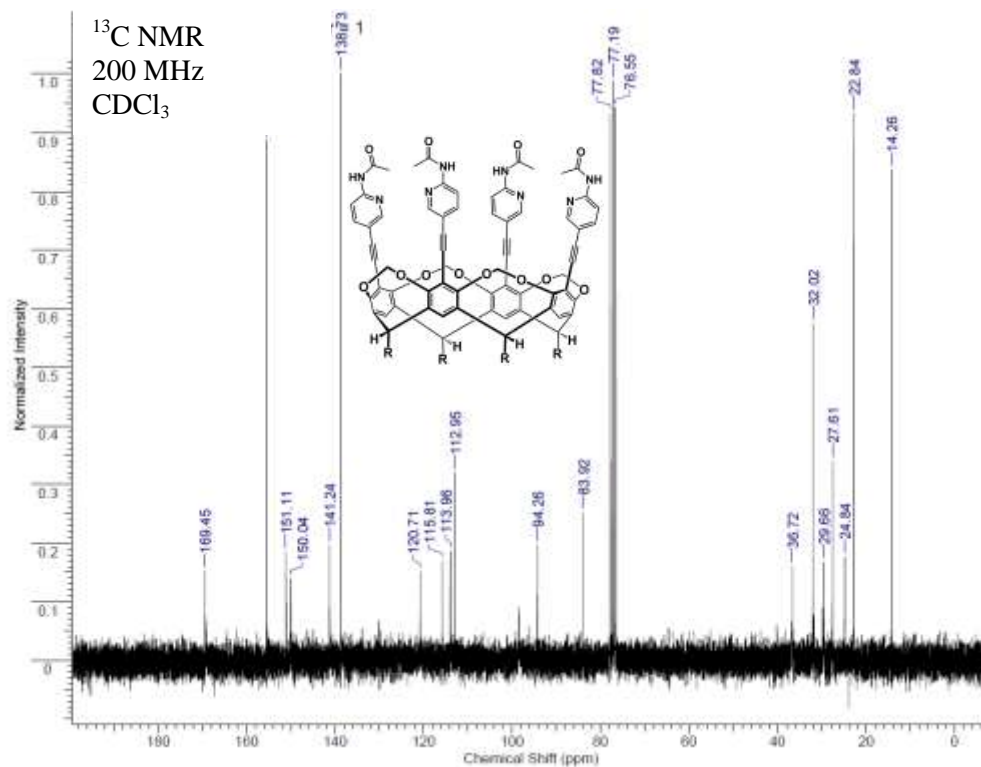

**Figure 8** <sup>13</sup>C NMR for *C*-Pentyl-tetra-(2-acetamidopyridyl-5-ethynyl)cavitand, **4**

---

<sup>1</sup> X. Liu and R. Warmuth, *Nature Protocols.*, 2007, **2**, 1288.

<sup>2</sup> J. A. Bryant, M. T. Blanda, M. Vincenti and D. J. Cram, *J. Am. Chem. Soc.*, 1991, **113**, 2167.
